# Supplementary material for: Evolution of fluid redox in a fault zone of the Pic de Port-Vieux thrust in the Pyrenees Axial Zone (Spain)
Source: Copernicus journal article supplement (doi:10.5194/egusphere-2024-386), 2024-03-15
Supplement: Supplementary file 2 [file egusphere-2024-386-supplement.pdf]

Supplement

Table S1. EPMA analyses carried out on chlorites in each area (red dots in Figures 5 and 6).

|                   |    | SiO <sub>2</sub> | TiO <sub>2</sub> | Al <sub>2</sub> O <sub>3</sub> | FeO   | MgO   | MnO  | CaO  | Na <sub>2</sub> O | K <sub>2</sub> O | □     |
|-------------------|----|------------------|------------------|--------------------------------|-------|-------|------|------|-------------------|------------------|-------|
|                   |    | Oxide wt (%)     |                  |                                |       |       |      |      |                   |                  |       |
| PPV12-07<br>Area1 | 1  | 27.05            | 0.02             | 23.03                          | 20.26 | 17.65 | 0.1  | 0.04 | 0                 | 0.04             | 88.19 |
|                   | 2  | 27.59            | 0.01             | 23.12                          | 20.99 | 16.84 | 0.06 | 0.06 | 0                 | 0.02             | 88.68 |
|                   | 3  | 27.39            | 0.03             | 22.57                          | 20.53 | 16.68 | 0.12 | 0.05 | 0                 | 0.04             | 87.41 |
|                   | 4  | 27.1             | 0.01             | 22.59                          | 20.63 | 17.09 | 0.19 | 0.05 | 0.01              | 0.05             | 87.73 |
|                   | 5  | 26.91            | 0.03             | 22.64                          | 20.36 | 16.91 | 0    | 0.06 | 0.08              | 0.03             | 87.01 |
|                   | 6  | 27.36            | 0.01             | 23.05                          | 20.48 | 16.57 | 0.11 | 0.04 | 0                 | 0.04             | 87.66 |
|                   | 7  | 26.97            | 0.02             | 23                             | 19.95 | 16.9  | 0.02 | 0.04 | 0                 | 0.02             | 86.92 |
|                   | 8  | 26.69            | 0                | 22.92                          | 20.39 | 16.5  | 0.06 | 0.04 | 0.03              | 0.06             | 86.7  |
|                   | 9  | 27.31            | 0.01             | 22.68                          | 19.73 | 17.27 | 0.18 | 0.04 | 0                 | 0.03             | 87.25 |
|                   | 10 | 26.86            | 0.02             | 23                             | 20.12 | 17.05 | 0.08 | 0.06 | 0                 | 0.04             | 87.23 |
|                   | 11 | 26.95            | 0.02             | 23.07                          | 19.8  | 17.18 | 0    | 0.05 | 0.01              | 0.04             | 87.12 |
|                   | 12 | 27.53            | 0.05             | 22.53                          | 19.9  | 17    | 0.17 | 0.07 | 0.02              | 0.04             | 87.31 |
|                   | 13 | 28.04            | 0                | 22.68                          | 19.83 | 16.59 | 0.12 | 0.04 | 0                 | 0.09             | 87.4  |
|                   | 14 | 27.1             | 0.01             | 22.69                          | 20.38 | 17.07 | 0    | 0.04 | 0.03              | 0.05             | 87.37 |
| PPV12-07<br>Area2 | 1  | 27.56            | 0.02             | 22.65                          | 19.32 | 17.88 | 0.04 | 0.04 | 0.01              | 0.05             | 87.56 |
|                   | 2  | 27.85            | 0.02             | 22.42                          | 19.39 | 17.95 | 0.04 | 0.06 | 0                 | 0.01             | 87.74 |
|                   | 3  | 27.49            | 0                | 23                             | 20.02 | 16.93 | 0.05 | 0.06 | 0                 | 0.05             | 87.59 |
|                   | 4  | 27.07            | 0.03             | 23.57                          | 20.29 | 16.82 | 0.04 | 0.02 | 0.02              | 0.04             | 87.9  |
|                   | 5  | 26.85            | 0.02             | 23.08                          | 19.56 | 17.72 | 0.05 | 0.03 | 0.01              | 0.02             | 87.34 |
|                   | 6  | 26.59            | 0.02             | 22.68                          | 21.07 | 17.18 | 0.09 | 0.07 | 0                 | 0.02             | 87.71 |
|                   | 7  | 26.7             | 0.03             | 22.36                          | 20.24 | 17.09 | 0.01 | 0.04 | 0                 | 0.02             | 86.48 |
|                   | 8  | 26.3             | 0.03             | 23.13                          | 20.95 | 16.08 | 0.06 | 0.04 | 0.02              | 0.03             | 86.64 |
|                   | 9  | 26.87            | 0.01             | 22.48                          | 20.08 | 17.78 | 0.04 | 0.03 | 0.03              | 0.02             | 87.34 |
|                   | 10 | 27.19            | 0.04             | 22.12                          | 19.08 | 18.02 | 0.01 | 0.01 | 0.01              | 0.02             | 86.51 |
|                   | 11 | 27.1             | 0                | 22.35                          | 19.8  | 17.05 | 0.05 | 0.06 | 0                 | 0.02             | 86.42 |
|                   | 12 | 26.18            | 0.02             | 22.62                          | 20.3  | 16.99 | 0.04 | 0.05 | 0                 | 0.05             | 86.25 |
|                   | 13 | 27.38            | 0.01             | 23.22                          | 20.37 | 17.11 | 0.06 | 0.03 | 0.01              | 0.01             | 88.2  |
|                   | 14 | 26.71            | 0.05             | 23.14                          | 20.66 | 16.21 | 0.07 | 0.06 | 0.02              | 0.02             | 86.95 |
|                   | 15 | 27.64            | 0.04             | 22.5                           | 19.63 | 16.83 | 0.05 | 0.06 | 0                 | 0.02             | 86.77 |
|                   | 16 | 26.78            | 0.03             | 22.47                          | 20.36 | 15.84 | 0.07 | 0.09 | 0                 | 0.04             | 85.68 |
|                   | 17 | 27.19            | 0                | 23.1                           | 20.44 | 16.24 | 0.05 | 0.1  | 0                 | 0.04             | 87.16 |
| PPV12-05<br>Area1 | 1  | 25.94            | 0.03             | 22.79                          | 23.69 | 14.55 | 0.03 | 0.05 | 0                 | 0.01             | 87.09 |
|                   | 2  | 26.74            | 0.03             | 22.82                          | 23.01 | 14.45 | 0.03 | 0.06 | 0                 | 0.02             | 87.16 |
|                   | 3  | 27.51            | 0.02             | 22.03                          | 21.2  | 16.77 | 0.04 | 0.07 | 0                 | 0                | 87.64 |
|                   | 4  | 27.35            | 0                | 21.98                          | 21.78 | 16.09 | 0.05 | 0.06 | 0.04              | 0.02             | 87.37 |
|                   | 5  | 26.41            | 0.01             | 22.28                          | 23.87 | 14.79 | 0.03 | 0.04 | 0.01              | 0.02             | 87.46 |
| PPV12-05<br>Area2 | 1  | 26.42            | 0                | 22.97                          | 22.14 | 14.86 | 0.03 | 0.04 | 0                 | 0                | 86.46 |
|                   | 2  | 26.62            | 0.01             | 22.55                          | 21.11 | 15.67 | 0.05 | 0.1  | 0.02              | 0.04             | 86.16 |
|                   | 2  | 26.72            | 0.04             | 22.64                          | 21.89 | 15.21 | 0.04 | 0.06 | 0                 | 0.02             | 86.62 |
|                   | 4  | 26.43            | 0.01             | 22.47                          | 21.54 | 15.26 | 0.04 | 0.07 | 0                 | 0.04             | 85.86 |
|                   | 5  | 26.09            | 0.02             | 21.99                          | 23.14 | 14.85 | 0.06 | 0.08 | 0.05              | 0.01             | 86.29 |

Table S2. XANES data obtained on chlorite in each area ( blue points on Figures 5 and 6).

|                   |   | Centroid energy<br>(eV) | Integrated<br>pre-edge intensity | XFe <sup>3+</sup> |
|-------------------|---|-------------------------|----------------------------------|-------------------|
| PPV12-07 Area1    | 1 | 7113.53                 | 0.1174                           | 0.30              |
|                   | 2 | 7113.62                 | 0.1054                           | 0.36              |
|                   | 3 | 7113.51                 | 0.1110                           | 0.29              |
|                   | 4 | 7113.48                 | 0.1133                           | 0.27              |
| <i>Mean value</i> |   |                         |                                  | <i>0.31</i>       |
| <i>St Dev</i>     |   |                         |                                  | <i>0.04</i>       |
| PPV12-07 Area2    | 1 | 7113.58                 | 0.1202                           | 0.34              |
|                   | 2 | 7113.55                 | 0.1134                           | 0.32              |
|                   | 3 | 7113.58                 | 0.1034                           | 0.34              |
|                   | 4 | 7113.43                 | 0.1140                           | 0.24              |
|                   | 5 | 7113.68                 | 0.1001                           | 0.41              |
|                   | 6 | 7113.53                 | 0.1080                           | 0.30              |
| <i>Mean value</i> |   |                         |                                  | <i>0.32</i>       |
| <i>St Dev</i>     |   |                         |                                  | <i>0.06</i>       |
| PPV12-05 Area1    | 1 | 7113.58                 | 0.0924                           | 0.33              |
|                   | 2 | 7113.80                 | 0.1171                           | 0.49              |
|                   | 3 | 7113.51                 | 0.1053                           | 0.29              |
|                   | 4 | 7113.64                 | 0.0958                           | 0.37              |
|                   | 5 | 7113.77                 | 0.1192                           | 0.47              |
| <i>Mean value</i> |   |                         |                                  | <i>0.39</i>       |
| <i>St Dev</i>     |   |                         |                                  | <i>0.09</i>       |
| PPV12-05 Area2    | 1 | 7113.12                 | 0.0988                           | 0.07              |
|                   | 2 | 7113.39                 | 0.1204                           | 0.22              |
|                   | 3 | 7113.23                 | 0.0991                           | 0.12              |
|                   | 4 | 7113.42                 | 0.1241                           | 0.23              |
|                   | 5 | 7113.29                 | 0.0998                           | 0.16              |
|                   | 6 | 7113.29                 | 0.0998                           | 0.16              |
| <i>Mean value</i> |   |                         |                                  | <i>0.16</i>       |
| <i>St Dev</i>     |   |                         |                                  | <i>0.07</i>       |

Table S3. Structural formulae of newly formed chlorite calculated by coupling XANES and microprobe results.

|                   |    | Tetrahedral layer |                  |                  | Octahedral layer |                  |                     |      |      |        |
|-------------------|----|-------------------|------------------|------------------|------------------|------------------|---------------------|------|------|--------|
|                   |    | Si                | <sup>IV</sup> Al | <sup>VI</sup> Al | Fe <sup>2+</sup> | Fe <sup>3+</sup> | Fe <sub>total</sub> | Mg   | Mn   | □ Octa |
| PPV12-07 Area1    | 1  | 2.74              | 1.26             | 1.49             | 1.18             | 0.53             | 1.72                | 2.66 | 0.01 | 5.88   |
|                   | 2  | 2.78              | 1.22             | 1.53             | 1.22             | 0.55             | 1.77                | 2.53 | 0    | 5.84   |
|                   | 3  | 2.8               | 1.2              | 1.52             | 1.21             | 0.54             | 1.76                | 2.54 | 0.01 | 5.83   |
|                   | 4  | 2.77              | 1.23             | 1.48             | 1.22             | 0.55             | 1.76                | 2.6  | 0.02 | 5.86   |
|                   | 5  | 2.76              | 1.23             | 1.51             | 1.21             | 0.54             | 1.75                | 2.59 | 0    | 5.85   |
|                   | 6  | 2.79              | 1.21             | 1.55             | 1.2              | 0.54             | 1.74                | 2.52 | 0.01 | 5.82   |
|                   | 7  | 2.76              | 1.23             | 1.54             | 1.18             | 0.53             | 1.71                | 2.58 | 0    | 5.84   |
|                   | 8  | 2.75              | 1.25             | 1.54             | 1.21             | 0.55             | 1.76                | 2.54 | 0.01 | 5.84   |
|                   | 9  | 2.79              | 1.21             | 1.52             | 1.16             | 0.52             | 1.68                | 2.63 | 0.02 | 5.84   |
|                   | 10 | 2.75              | 1.25             | 1.52             | 1.19             | 0.53             | 1.72                | 2.6  | 0.01 | 5.85   |
|                   | 11 | 2.75              | 1.24             | 1.54             | 1.17             | 0.52             | 1.69                | 2.62 | 0    | 5.85   |
|                   | 12 | 2.81              | 1.19             | 1.52             | 1.17             | 0.53             | 1.7                 | 2.59 | 0.01 | 5.82   |
|                   | 13 | 2.85              | 1.15             | 1.57             | 1.16             | 0.52             | 1.69                | 2.51 | 0.01 | 5.78   |
|                   | 14 | 2.77              | 1.23             | 1.51             | 1.2              | 0.54             | 1.74                | 2.6  | 0    | 5.85   |
| <i>Mean Value</i> |    | 2.78              | 1.22             | 1.52             | 1.19             | 0.54             | 1.73                | 2.58 | 0.01 | 5.84   |
| <i>St Dev</i>     |    | 0.03              | 0.03             | 0.02             | 0.02             | 0.01             | 0.03                | 0.05 | 0.01 | 0.02   |
| PPV12-07 Area2    | 1  | 2.79              | 1.2              | 1.5              | 1.11             | 0.52             | 1.64                | 2.7  | 0    | 5.84   |
|                   | 2  | 2.82              | 1.18             | 1.49             | 1.12             | 0.52             | 1.64                | 2.71 | 0    | 5.84   |
|                   | 3  | 2.79              | 1.21             | 1.55             | 1.16             | 0.54             | 1.7                 | 2.57 | 0    | 5.82   |
|                   | 4  | 2.75              | 1.25             | 1.57             | 1.17             | 0.55             | 1.72                | 2.54 | 0    | 5.84   |
|                   | 5  | 2.74              | 1.26             | 1.51             | 1.13             | 0.53             | 1.67                | 2.69 | 0    | 5.87   |
|                   | 6  | 2.72              | 1.28             | 1.46             | 1.23             | 0.58             | 1.8                 | 2.62 | 0.01 | 5.9    |
|                   | 7  | 2.76              | 1.24             | 1.49             | 1.19             | 0.56             | 1.75                | 2.63 | 0    | 5.87   |
|                   | 8  | 2.72              | 1.27             | 1.55             | 1.23             | 0.58             | 1.81                | 2.48 | 0.01 | 5.85   |
|                   | 9  | 2.75              | 1.25             | 1.46             | 1.17             | 0.55             | 1.72                | 2.71 | 0    | 5.89   |
|                   | 10 | 2.79              | 1.21             | 1.47             | 1.11             | 0.52             | 1.64                | 2.76 | 0    | 5.86   |
|                   | 11 | 2.79              | 1.21             | 1.51             | 1.16             | 0.55             | 1.71                | 2.62 | 0    | 5.84   |
|                   | 12 | 2.72              | 1.28             | 1.49             | 1.2              | 0.56             | 1.76                | 2.63 | 0    | 5.89   |
|                   | 13 | 2.77              | 1.23             | 1.54             | 1.17             | 0.55             | 1.72                | 2.58 | 0.01 | 5.84   |
|                   | 14 | 2.75              | 1.25             | 1.56             | 1.21             | 0.57             | 1.78                | 2.49 | 0.01 | 5.83   |
|                   | 15 | 2.83              | 1.17             | 1.55             | 1.14             | 0.54             | 1.68                | 2.57 | 0    | 5.8    |
|                   | 16 | 2.79              | 1.2              | 1.56             | 1.21             | 0.57             | 1.78                | 2.46 | 0.01 | 5.81   |
|                   | 17 | 2.78              | 1.22             | 1.57             | 1.19             | 0.56             | 1.75                | 2.48 | 0    | 5.81   |
| <i>Mean Value</i> |    | 2.77              | 1.23             | 1.52             | 1.17             | 0.55             | 1.72                | 2.6  | 0    | 5.85   |
| <i>St Dev</i>     |    | 0.03              | 0.03             | 0.04             | 0.04             | 0.02             | 0.06                | 0.09 | 0    | 0.03   |
| PPV12-05 Area1    | 1  | 2.71              | 1.28             | 1.53             | 1.26             | 0.81             | 2.07                | 2.27 | 0    | 5.87   |
|                   | 2  | 2.78              | 1.22             | 1.57             | 1.22             | 0.78             | 2                   | 2.24 | 0    | 5.81   |
|                   | 3  | 2.81              | 1.18             | 1.47             | 1.11             | 0.71             | 1.81                | 2.56 | 0    | 5.85   |
|                   | 4  | 2.82              | 1.18             | 1.49             | 1.14             | 0.73             | 1.88                | 2.47 | 0    | 5.84   |
|                   | 5  | 2.75              | 1.25             | 1.49             | 1.27             | 0.81             | 2.08                | 2.3  | 0    | 5.87   |
| <i>Mean Value</i> |    | 2.78              | 1.22             | 1.51             | 1.2              | 0.77             | 1.97                | 2.37 | 0    | 5.85   |
| <i>St Dev</i>     |    | 0.04              | 0.04             | 0.04             | 0.07             | 0.05             | 0.12                | 0.14 | 0    | 0.02   |

|                   |   |      |      |      |      |      |      |      |      |      |
|-------------------|---|------|------|------|------|------|------|------|------|------|
| PPV12-05 Area2    | 1 | 2.76 | 1.24 | 1.58 | 1.62 | 0.31 | 1.93 | 2.31 | 0    | 5.83 |
|                   | 2 | 2.77 | 1.22 | 1.55 | 1.55 | 0.29 | 1.84 | 2.43 | 0    | 5.82 |
|                   | 3 | 2.78 | 1.22 | 1.56 | 1.6  | 0.3  | 1.9  | 2.36 | 0    | 5.82 |
|                   | 4 | 2.77 | 1.23 | 1.55 | 1.59 | 0.3  | 1.89 | 2.39 | 0    | 5.83 |
|                   | 5 | 2.75 | 1.25 | 1.49 | 1.71 | 0.33 | 2.04 | 2.33 | 0.01 | 5.87 |
| <i>Mean Value</i> |   | 2.77 | 1.23 | 1.54 | 1.61 | 0.31 | 1.92 | 2.36 | 0    | 5.83 |
| <i>St Dev</i>     |   | 0.01 | 0.01 | 0.04 | 0.06 | 0.01 | 0.07 | 0.05 | 0    | 0.02 |

10 Table S4. Calculated temperatures obtained by (1) the semi-empirical thermometer developed by Inoue (Inoue et al. 2009) with  $Fe_{total} = Fe^{2+}$ , (2) the semi-empirical thermometer developed by Inoue (Inoue et al. 2009) using the mean value of  $XFe^{3+}$  obtained by XANES measurements, (3) the thermodynamical model developed by Vidal et al. (2001, 2005, 2006) and Lanari et al. (2014) and the modelled  $XFe^{3+}$ .

|                   |    | Modeled temperature (°C) |                  |                  | Modeled $XFe^{3+}$ |
|-------------------|----|--------------------------|------------------|------------------|--------------------|
|                   |    | T <sup>(1)</sup>         | T <sup>(2)</sup> | T <sup>(3)</sup> | $XFe^{3+(3)}$      |
| PPV12-07 Area1    | 1  | 367                      | 330              | 313              | 18                 |
|                   | 2  | 312                      | 276              | 266              | 25                 |
|                   | 3  | 302                      | 266              | 256              | 29                 |
|                   | 4  | 344                      | 306              | 288              | 24                 |
|                   | 5  | 328                      | 292              | 282              | 24                 |
|                   | 6  | 300                      | 264              | 261              | 25                 |
|                   | 7  | 320                      | 284              | 278              | 22                 |
|                   | 8  | 326                      | 290              | 286              | 20                 |
|                   | 9  | 317                      | 281              | 270              | 27                 |
|                   | 10 | 339                      | 303              | 297              | 19                 |
|                   | 11 | 329                      | 294              | 291              | 20                 |
|                   | 12 | 292                      | 257              | 250              | 32                 |
|                   | 13 | 251                      | 219              | 222              | 36                 |
|                   | 14 | 329                      | 293              | 282              | 24                 |
| <i>Mean Value</i> |    | 318                      | 282              | 274              | 25                 |
| <i>St Dev</i>     |    | 27                       | 26               | 23               | 5                  |
| PPV12-07 Area2    | 1  | 316                      | 281              | 268              | 30                 |
|                   | 2  | 306                      | 270              | 252              | 35                 |
|                   | 3  | 295                      | 260              | 258              | 27                 |
|                   | 4  | 322                      | 286              | 291              | 17                 |
|                   | 5  | 360                      | 324              | 313              | 17                 |
|                   | 6  | 395                      | 356              | 344              | 13                 |
|                   | 7  | 352                      | 314              | 290              | 23                 |
|                   | 8  | 345                      | 307              | 313              | 12                 |
|                   | 9  | 377                      | 339              | 312              | 21                 |
|                   | 10 | 337                      | 301              | 275              | 31                 |
|                   | 11 | 314                      | 277              | 265              | 28                 |
|                   | 12 | 382                      | 344              | 340              | 12                 |
|                   | 13 | 322                      | 285              | 279              | 22                 |
|                   | 14 | 319                      | 282              | 285              | 18                 |
|                   | 15 | 271                      | 237              | 235              | 34                 |
|                   | 16 | 287                      | 250              | 254              | 26                 |

|                   |    |     |     |     |    |
|-------------------|----|-----|-----|-----|----|
|                   | 17 | 289 | 253 | 259 | 24 |
| <i>Mean Value</i> |    | 329 | 292 | 284 | 23 |
| <i>St Dev</i>     |    | 36  | 35  | 31  | 7  |
| <hr/>             |    |     |     |     |    |
| PPV12-05 Area1    | 1  | 367 | 316 | 321 | 10 |
|                   | 2  | 295 | 248 | 261 | 20 |
|                   | 3  | 314 | 267 | 254 | 32 |
|                   | 4  | 304 | 257 | 251 | 31 |
|                   | 5  | 355 | 303 | 291 | 18 |
| <i>Mean Value</i> |    | 327 | 278 | 276 | 22 |
| <i>St Dev</i>     |    | 32  | 30  | 30  | 9  |
| <hr/>             |    |     |     |     |    |
| PPV12-05 Area2    | 1  | 311 | 290 | 275 | 17 |
|                   | 2  | 306 | 285 | 270 | 22 |
|                   | 3  | 302 | 280 | 263 | 22 |
|                   | 4  | 309 | 287 | 270 | 21 |
|                   | 5  | 352 | 328 | 292 | 19 |
| <i>Mean Value</i> |    | 316 | 294 | 274 | 20 |
| <i>St Dev</i>     |    | 20  | 19  | 11  | 2  |
| <hr/>             |    |     |     |     |    |
